# Supplementary material for: Clinically Relevant Cytotoxic Immune Cell Signatures and Clonal Expansion of T-Cell Receptors in High-Risk MYCN -Not-Amplified Human Neuroblastoma
Source: Oxford University Press journal article supplement (doi:10.1158/1078-0432.ccr-18-0599), 2018-05-21
Supplement: 10780432ccr180599-sup-197483_2_supp_4733170_p862ys.xlsx [file 10780432ccr180599-sup-197483_2_supp_4733170_p862ys.xlsx]

## Sheet: NB150_immune_NK_act_TCD8_cytoly
Supplementary Table S4. Pair-wise comparison of ImmuneScores among 4 consensus clusters
Cluster_a	Cluster_b	mean_a	mean_b	std_a	std_b	p	Adjusted holm_p
1	2	-1171.15	-461.177	569.45	544.806	7.27981e-05	0.000582384
1	3	-1171.15	581.879	569.45	862.088	2.37578e-15	5.70186e-14
1	4	-1171.15	473.185	569.45	810.672	6.05323e-15	1.33171e-13
2	3	-461.177	581.879	544.806	862.088	4.20926e-08	6.73481e-07
2	4	-461.177	473.185	544.806	810.672	1.74356e-07	2.61535e-06
3	4	581.879	473.185	862.088	810.672	0.512457	0.885601
