# Supplementary material for: Clinically Relevant Cytotoxic Immune Cell Signatures and Clonal Expansion of T-Cell Receptors in High-Risk MYCN -Not-Amplified Human Neuroblastoma
Source: Oxford University Press journal article supplement (doi:10.1158/1078-0432.ccr-18-0599), 2018-05-21
Supplement: 10780432ccr180599-sup-197483_2_supp_4733173_p862y6.xlsx [file 10780432ccr180599-sup-197483_2_supp_4733173_p862y6.xlsx]

## Sheet: mutations_mycn-na_age_gt_540_wi
Supplementary Table S2. Expressed somatic mutation burden for individual tumors in the TARGET cohort.
TARGET USI	Expressed Somatic Mutation Count	Group
PALBFW	2	MYCN-sig low
PALETP	0	MYCN-sig low
PAMVRA	0	MYCN-sig low
PAITEG	1	MYCN-sig low
PAKYZS	0	MYCN-sig low
PAIXIF	0	MYCN-sig low
PALCBW	0	MYCN-sig low
PAMYCE	2	MYCN-sig low
PANKFE	0	MYCN-sig low
PANZPV	0	MYCN-sig low
PANZVU	5	MYCN-sig low
PANBMJ	0	MYCN-sig low
PAPHPE	3	MYCN-sig low
PARACM	4	MYCN-sig low
PANRVJ	6	MYCN-sig low
PANSBN	3	MYCN-sig low
PANUIF	0	MYCN-sig low
PAPTAN	2	MYCN-sig low
PAPVFD	10	MYCN-sig low
PARACS	7	MYCN-sig low
PARBGP	10	MYCN-sig low
PARDIW	8	MYCN-sig low
PARDCK	18	MYCN-sig low
PARGKK	4	MYCN-sig low
PAIFXV	6	MYCN-sig low
PARVLK	2	MYCN-sig low
PARZIP	14	MYCN-sig low
PASGUT	21	MYCN-sig low
PASMJG	0	MYCN-sig low
PASPER	13	MYCN-sig low
PASRFS	10	MYCN-sig low
PASTCN	8	MYCN-sig low
PASTKC	33	MYCN-sig low
PASXGP	8	MYCN-sig low
PASXRJ	1	MYCN-sig low
PATEKG	1	MYCN-sig low
PANXJL	3	MYCN-sig low
PAPVRN	2	MYCN-sig low
PASGAP	2	MYCN-sig low
PALNVP	2	MYCN-sig low
PALXTB	1	MYCN-sig low
PANNMS	8	MYCN-sig low
PATCFL	0	MYCN-sig low
PALWVJ	5	MYCN-sig high
PALIIN	2	MYCN-sig high
PANBSP	6	MYCN-sig high
PANYGR	5	MYCN-sig high
PAPBGH	2	MYCN-sig high
PAIVHE	5	MYCN-sig high
PAITCI	1	MYCN-sig high
PALTEG	0	MYCN-sig high
PAPBZI	14	MYCN-sig high
PAIPGU	5	MYCN-sig high
PANRHJ	1	MYCN-sig high
PANLET	10	MYCN-sig high
PANWRR	8	MYCN-sig high
PAPKXS	17	MYCN-sig high
PAPUWY	11	MYCN-sig high
PAPVXS	8	MYCN-sig high
PARAMT	9	MYCN-sig high
PARFWB	11	MYCN-sig high
PARKGJ	4	MYCN-sig high
PARSBI	7	MYCN-sig high
PARYNK	13	MYCN-sig high
PASEGA	13	MYCN-sig high
PASFGG	6	MYCN-sig high
PASMNT	10	MYCN-sig high
PASSRS	22	MYCN-sig high
PASUCB	13	MYCN-sig high
PASUYG	6	MYCN-sig high
PASWVY	10	MYCN-sig high
PASXHE	15	MYCN-sig high
PATBMM	9	MYCN-sig high
PATEPF	18	MYCN-sig high
PATFCY	3	MYCN-sig high
PATGLU	2	MYCN-sig high
PATHVK	20	MYCN-sig high
PATINJ	3	MYCN-sig high
PAPLSD	4	MYCN-sig high
PASYPX	7	MYCN-sig high
PAMNLH	10	MYCN-sig high
PAPEAV	4	MYCN-sig high
PAISNS	5	MYCN-sig high
PASNEF	4	MYCN-sig high
PASWIJ	5	MYCN-sig high
PATDXC	5	MYCN-sig high
PALZZV	4	MYCN-A
PAMMXF	2	MYCN-A
PAMZMG	3	MYCN-A
PANUKV	3	MYCN-A
PAPEFE	1	MYCN-A
PAMZGT	4	MYCN-A
PAPUNH	6	MYCN-A
PAPZYP	9	MYCN-A
PAPBJE	11	MYCN-A
PAPCTS	4	MYCN-A
PAPZYZ	4	MYCN-A
PASNZU	10	MYCN-A
PASVRU	5	MYCN-A
PASWFB	3	MYCN-A
PASZPI	1	MYCN-A
PATDWN	5	MYCN-A
PATDXG	3	MYCN-A
PATESI	6	MYCN-A
PATFXV	6	MYCN-A
PAPTFZ	5	MYCN-A
PAPTLV	3	MYCN-A
PASXIE	8	MYCN-A
PASSRN	7	MYCN-A
PASXRG	7	MYCN-A
PAPKWN	0	MYCN-A
PALEVG	0	MYCN-A
PASWYR	0	MYCN-A
PAKZRH	2	4s
PAPICY	1	4s
PAPTDH	1	4s
PARFRE	4	4s
PARJVP	2	4s
PARNNC	1	4s
PARZHA	1	4s
PASCTR	3	4s
PASNML	2	4s
PASPBZ	1	4s
PASSWW	2	4s
PASUML	2	4s
PASZKE	2	4s
PATHKB	1	4s
PASCFC	0	4s
PASFIC	0	4s
PASMDM	0	4s
PATAYJ	0	4s
PATGJU	0	4s
